# Supplementary material for: A unique formyl iodoargentate exhibiting luminescent and photocurrent response properties
Source: Royal Society of Chemistry journal article supplement (doi:10.1039/c9dt02828e), 2019-01-01
Supplement: c9dt02828e1.pdf [file c9dt02828e1.pdf]

## Supporting Information

### A unique formyl iodoargentate exhibiting luminescent and photocurrent response properties

Lili Yang,<sup>a</sup> Jian Zhou,<sup>\*a</sup> Litao An,<sup>b</sup> Shumei Cao,<sup>\*a</sup> and Jun Hu<sup>a</sup>

**General Remarks.** All analytical grade chemicals were obtained commercially and used without further purification. IR spectra were obtained from a powdered sample pelletized with KBr on an ABB Bomen MB 102 series IR spectrophotometer in the range of 200–1200 cm<sup>-1</sup>. Energy-dispersive X-ray analysis (EDXA) was taken by using a JEOL JSM-6700F field-emission scanning electron microscope. Room-temperature optical diffuse reflectance spectra of the powdered samples were obtained with a Shimadzu UV-3150 spectrometer. The absorption data were calculated from reflectance spectra by using the Kubelka–Munk function:  $a/S = (1-R^2)/2R$ , where  $a$  is the absorption coefficient,  $S$  is the scattering coefficient, and  $R$  is the reflectance. PXRD patterns were obtained using a Bruker D8 Advance XRD diffractometer with Cu K $\alpha$  radiation ( $\lambda = 1.54056 \text{ \AA}$ ). The crystals of **1** were grinded and pressed uniformly on the FTO glass. The photocurrent experiment was performed on a CHI650E electrochemistry workstation in a three-electrode system, the sample coated ITO glass as the working electrode, a Pt slice as auxiliary electrode and a saturated calomel electrode (SCE) as reference electrode. The supporting electrolyte solution was 0.1 mol·dm<sup>-3</sup> Na<sub>2</sub>SO<sub>4</sub> aqueous solution (100 mL). A 500 W Xe lamp with 420 nm was used as the illumination source. The lamp was kept on continuously, and a manual shutter was used to block exposure of the sample to the light. The sample was typically irradiated at intervals of 50 s.

#### Crystal Structure Determination

Single-crystal X-ray diffraction data for **1** were recorded on a Bruker APEX-II CCD diffractometer using a  $\omega$ -scan method with graphite monochromated Mo K $\alpha$  radiation ( $\lambda = 0.71073 \text{ \AA}$ ) at 296(2) K to a maximum  $2\theta$  value (55.64 °). Absorption corrections were applied were applied using SADABS. The structure of **1** was solved by Direct Methods and refined by full-matrix least-squares techniques using the SHELXL-2018/3 program. Non-hydrogen atoms were refined with anisotropic displacement parameters. The H atoms bonded to C/N atoms were positioned with idealized geometry and refined with fixed isotropic displacement parameters.

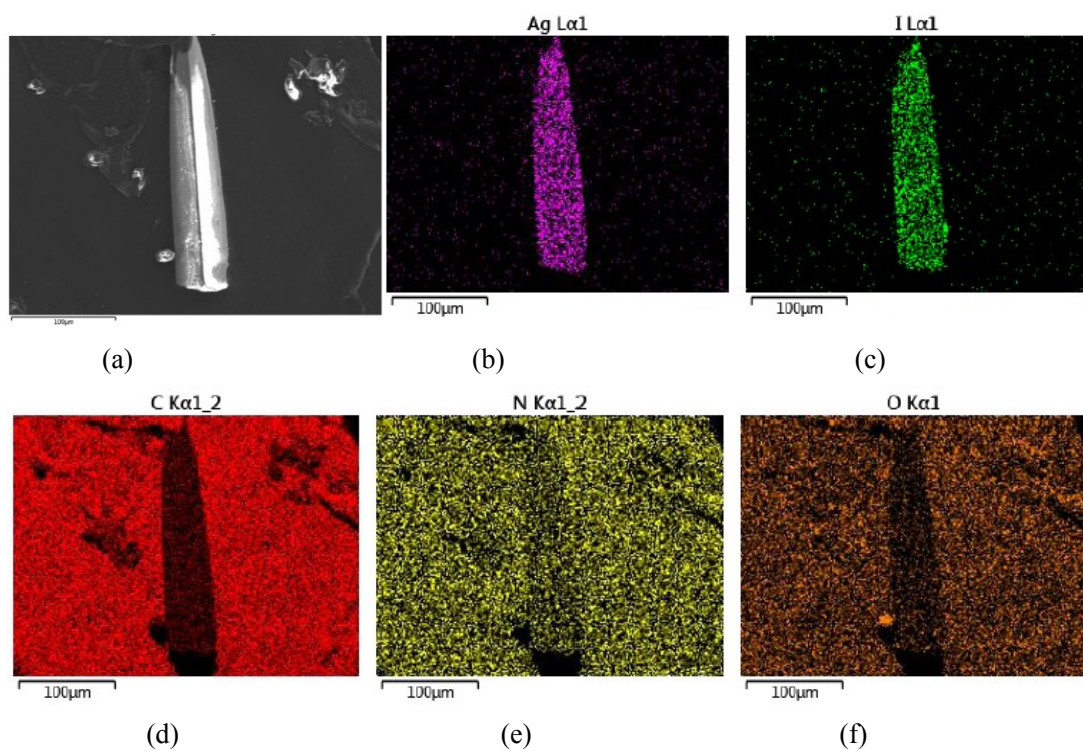

Fig. S1 (a) SEM image of **1**. (b-f) EDS elemental mappings of Ag, I, C, N and O for **1**.

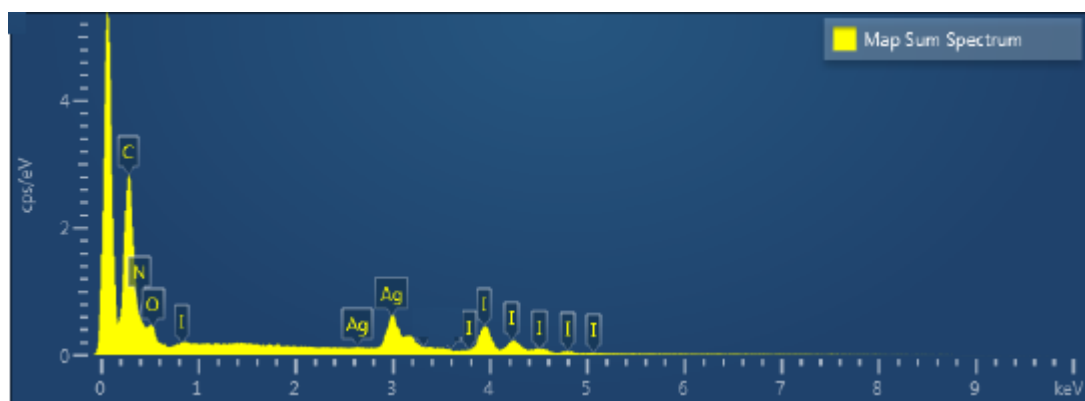

Fig. S2 EDS spectrum of **1**.

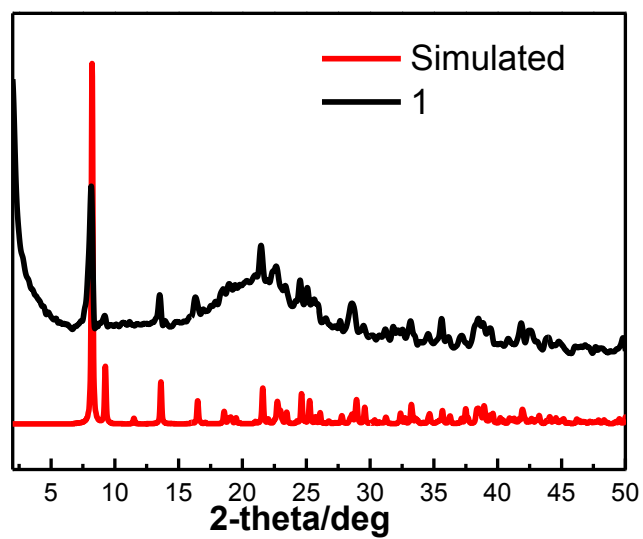

Fig. S3 Simulated and experimental powder XRD patterns of **1**.

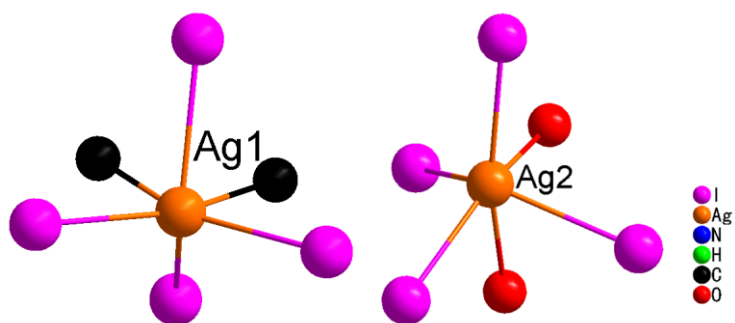

Fig. S4 the coordination environments of  $\text{Ag}^+$  ions.

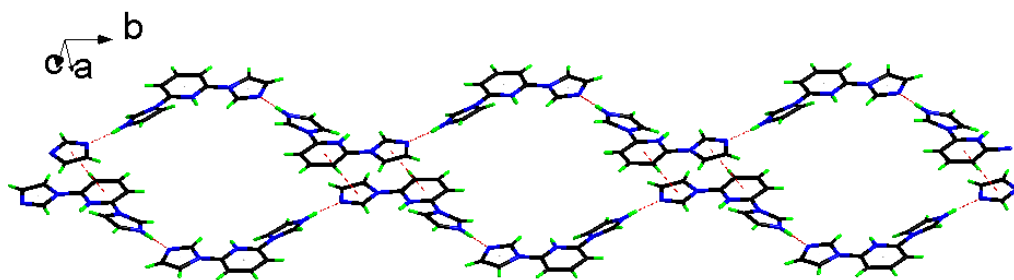

Fig. S5 The  $\pi$ - $\pi$  stacking interactions between 1-D  $[\text{H}_2\text{L}^{2+}]_n$  H-bond chains.

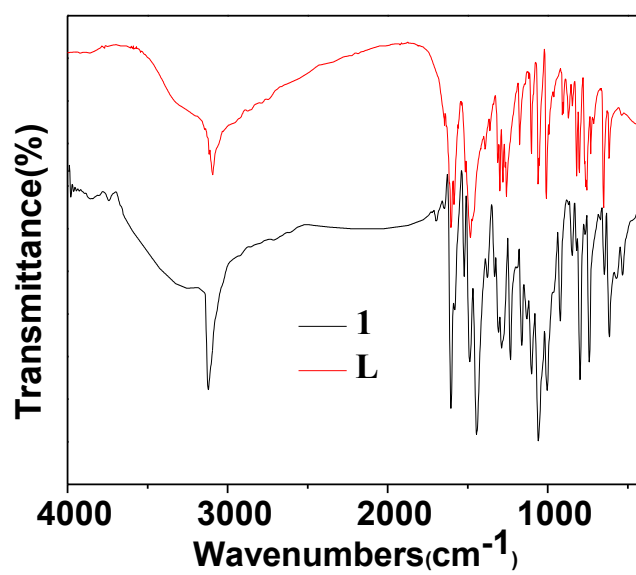

Fig. S6 The IR spectra of **1** and L.

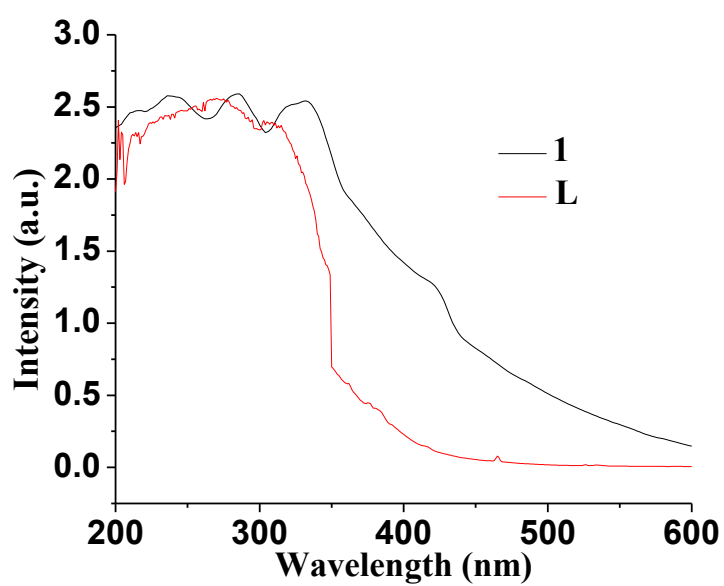

Fig. S7 The excitation spectra of L and **1**.

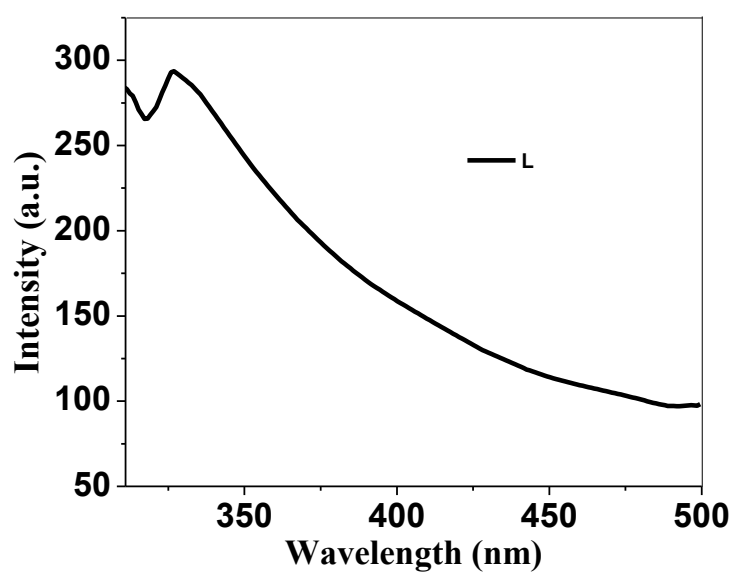

Fig. S8 Emission spectrum of L at room temperature.
